# Supplementary material for: Photochemical degradation of isoprene-derived 4,1-nitrooxy enal
Source: Copernicus journal article supplement (doi:10.5194/acp-16-5595-2016), 2016-05-04
Supplement: Supplementary file 1 [file acp-16-5595-2016-supplement.pdf]

Supplement of Atmos. Chem. Phys., 16, 5595–5610, 2016  
<http://www.atmos-chem-phys.net/16/5595/2016/>  
doi:10.5194/acp-16-5595-2016-supplement  
© Author(s) 2016. CC Attribution 3.0 License.

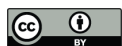

Atmospheric  
Chemistry  
and Physics  
Open Access  
EGU

*Supplement of*

## **Photochemical degradation of isoprene-derived 4,1-nitrooxy enal**

**Fulizi Xiong et al.**

*Correspondence to:* Paul B. Shepson ([pshepson@purdue.edu](mailto:pshepson@purdue.edu))

The copyright of individual parts of the supplement might differ from the CC-BY 3.0 licence.

Supplemental Figures, Xiong et al., 2016

This group of Supplemental figures are referred to in the main text.

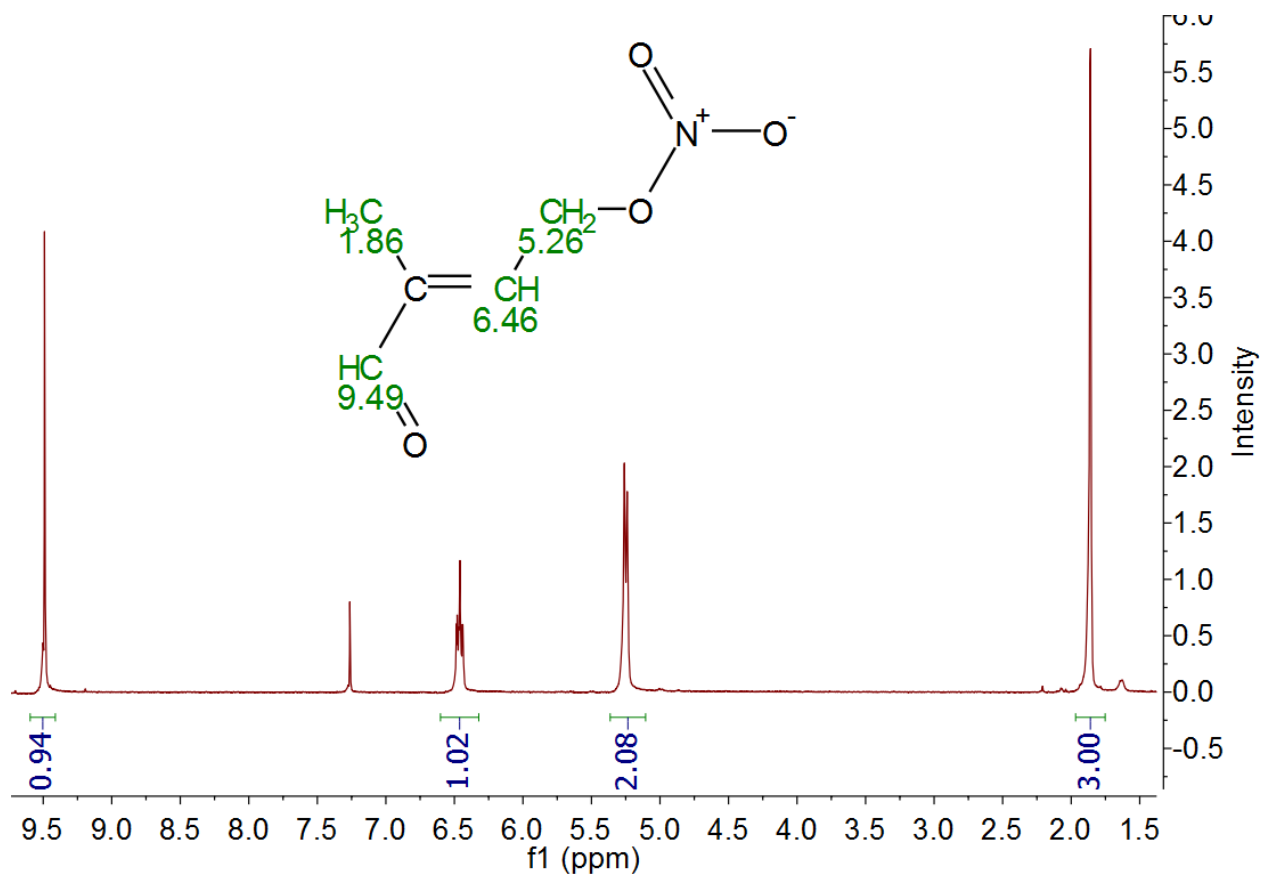

Figure S1.  $^1\text{H}$  NMR spectrum for the 4,1-isoprene carbonyl nitrate. The solvent  $\text{CDCl}_3$  has singlet peak at 7.26 ppm.

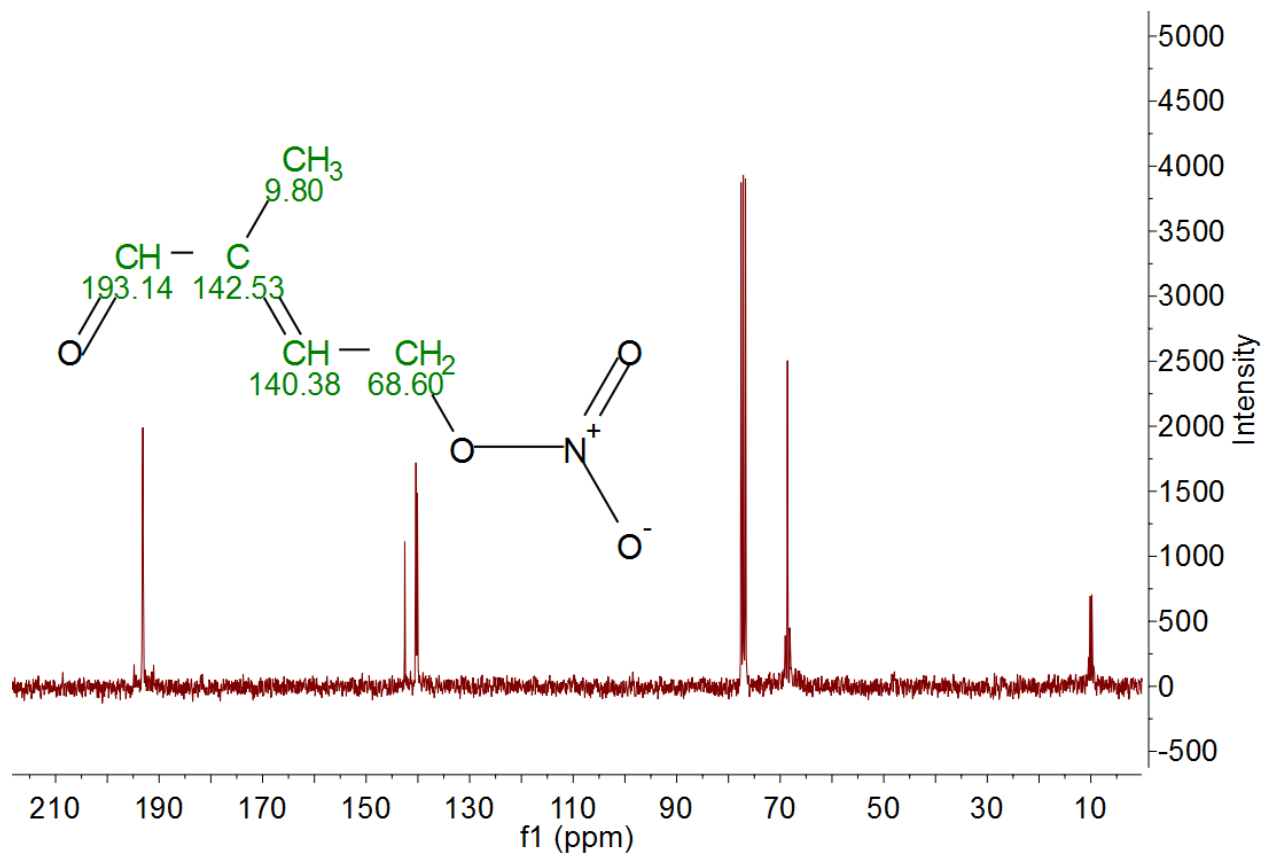

Figure S2.  $^{13}\text{C}$  NMR spectrum for the 4,1-isoprene carbonyl nitrate. The solvent  $\text{CDCl}_3$  has triplet peak at 80 ppm.

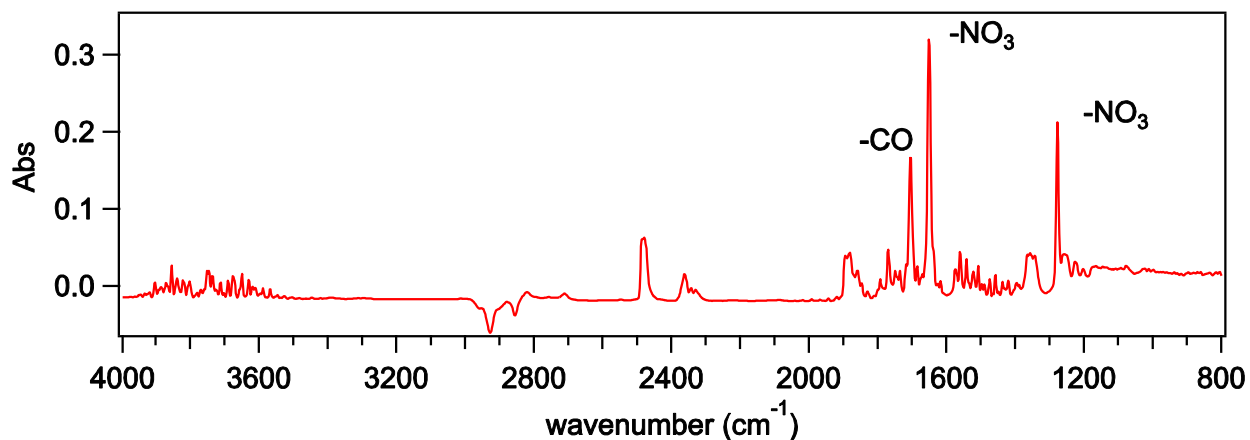

Figure S3. IR absorption spectrum for the 4,1-isoprene carbonyl nitrate. The  $\text{NO}_3$  group has absorption at  $1280\text{ cm}^{-1}$  and  $1640\text{ cm}^{-1}$ . The  $\text{CO}$  group has absorption at  $1700\text{ cm}^{-1}$ .

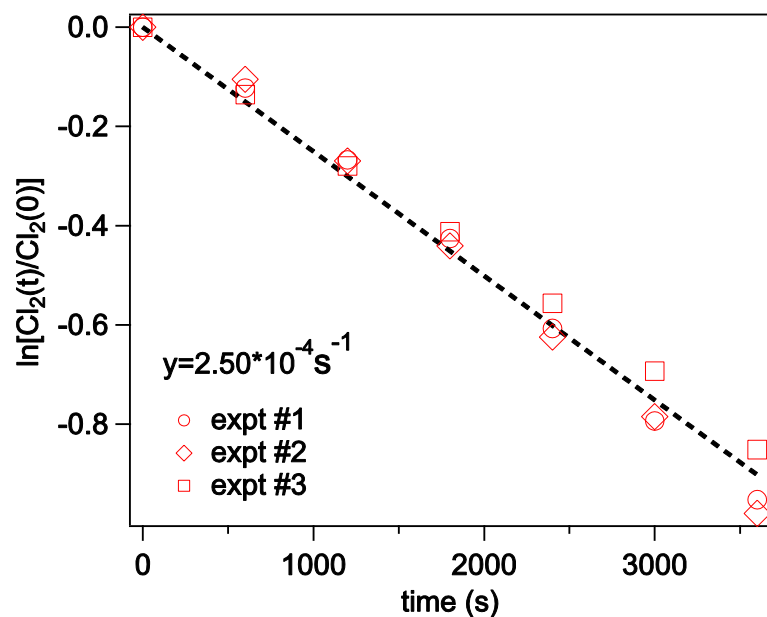

Figure S4. First-order photolysis loss of  $\text{Cl}_2$  in the reaction chamber.

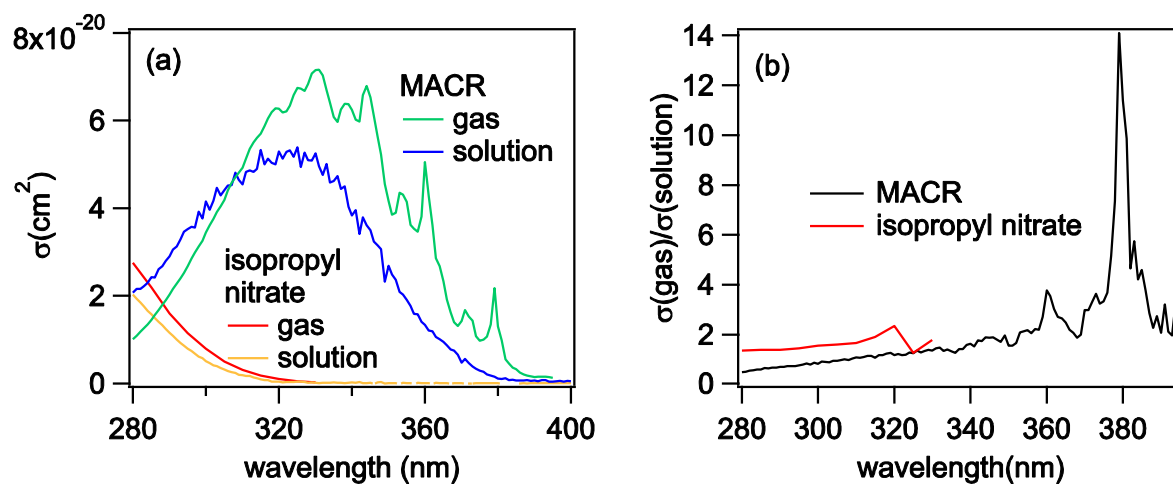

Figure S5. (a) The absorption spectra of MACR (gas phase in green, solution phase in blue) and isopropyl nitrate (gas phase in red, solution phase in gold). (b) The enhancement ratio of the gas-phase absorption relative to solution-phase absorption for MACR (black) and isopropyl nitrate (red).

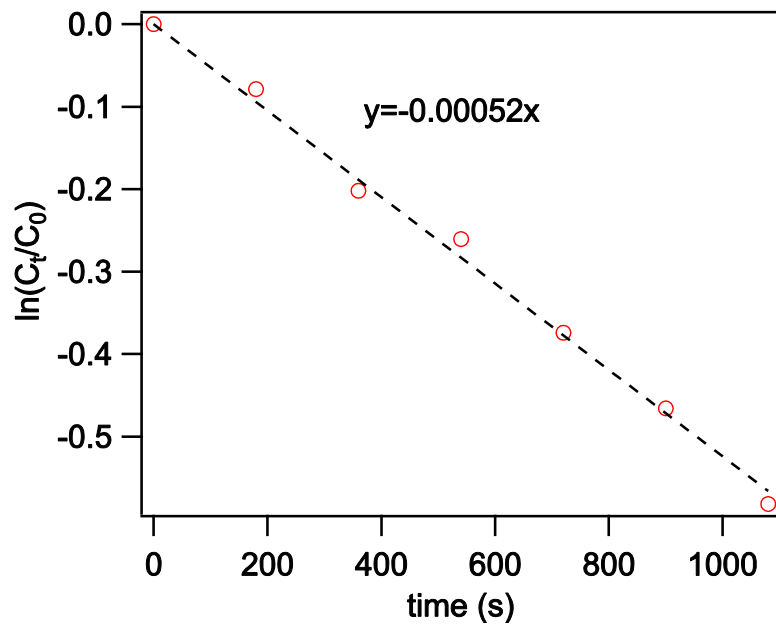

Figure S6. The apparent first-order decay of the PAN compound.

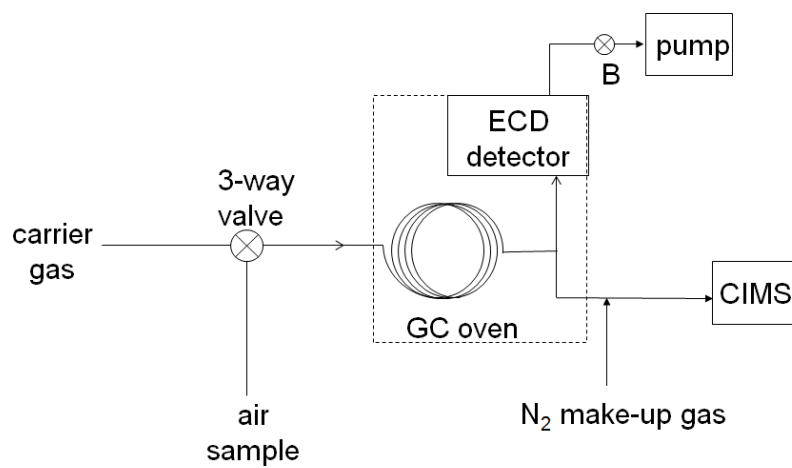

Figure S7. Low pressure GC-ECD/MS configuration.

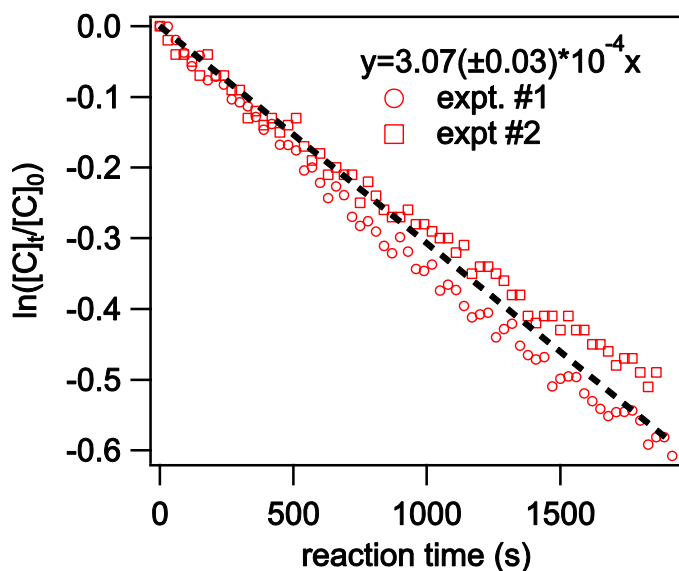

Figure S8. First-order loss rate of the carbonyl nitrate during the OH + carbonyl nitrate experiments.

Table S1. Initial conditions for the chamber experiments.

| experiment               | expt. # | 4,1-carbonyl nitrate (ppb) | propene (ppm) | isopropyl nitrite (ppb) | ozone (ppb) | cyclohexane (ppm) | NO (ppm) |
|--------------------------|---------|----------------------------|---------------|-------------------------|-------------|-------------------|----------|
| wall loss                | 1       | 8.6                        | 100           | -                       | -           | -                 | -        |
|                          | 2       | 16.9                       | 100           | -                       | -           | -                 | -        |
|                          | 3       | 20.2                       | 100           | -                       | -           | -                 | -        |
|                          | 4       | 13.7                       | 100           | -                       | -           | -                 | -        |
|                          | 5       | 17.8                       | 100           | -                       | -           | -                 | -        |
| photolysis               | 1       | 7.2                        | 100           | -                       | -           | -                 | -        |
|                          | 2       | 13.3                       | 100           | -                       | -           | -                 | -        |
|                          | 3       | 18.8                       | 100           | -                       | -           | -                 | -        |
|                          | 4       | 5.8                        | 100           | -                       | -           | -                 | -        |
|                          | 5       | 15.4                       | 100           | -                       | -           | -                 | -        |
| OH oxidation             | 1       | 59.1                       | 1.95          | 1000                    | -           | -                 | 4.24     |
|                          | 2       | 12.4                       | 0.64          | 500                     | -           | -                 | 0.97     |
|                          | 3       | 19.6                       | 0.57          | 500                     | -           | -                 | 0.92     |
|                          | 4       | 11.4                       | 1.62          | 1000                    | -           | -                 | 1.93     |
| O <sub>3</sub> oxidation | 1       | 19.2                       | 1.25          | -                       | 870         | 1000              | -        |
|                          | 2       | 22.0                       | 1.46          | -                       | 990         | 1000              | -        |
|                          | 3       | 34.1                       | 1.58          | -                       | 1100        | 1000              | -        |
|                          | 4       | 57.1                       | 1.49          | -                       | 1160        | 1000              | -        |
| OH products              | 1       | 13.5                       | -             | 22                      | -           | -                 | 0.082    |
|                          | 2       | 17.3                       | -             | 31                      | -           | -                 | 0.053    |

Table S2. The relative CIMS sensitivity to carbonyl nitrates.

|                  | 4,1-isoprene<br>carbonyl<br>nitrate | ethanal nitrate | MVK nitrate  |
|------------------|-------------------------------------|-----------------|--------------|
|                  | 1                                   | 9.9             | 30           |
| low pressure     | 1                                   | 16              | 34           |
|                  | 1                                   | 18              | 33           |
| low P average    | 1                                   | 15( $\pm$ 4)    | 32( $\pm$ 2) |
|                  | 1                                   | 13.8            | 33           |
| lower pressure   | 1                                   | 18.5            | 40           |
|                  | 1                                   | 15              | 35           |
| lower P average  | 1                                   | 16( $\pm$ 2)    | 36( $\pm$ 4) |
|                  | 1                                   | 13              | 35           |
| lowest pressure  | 1                                   | 15              | 38           |
|                  | 1                                   | 13              | 33           |
| lowest P average | 1                                   | 14( $\pm$ 1)    | 35( $\pm$ 3) |
| all average      | 1                                   | 15( $\pm$ 3)    | 34( $\pm$ 3) |
